# Supplementary material
Source: publisher site journal article supplement (https://www.dovepress.com/article/597295)
Supplement: Supplementary file 1 [file 597295%20Supplementary%20Material.docx]

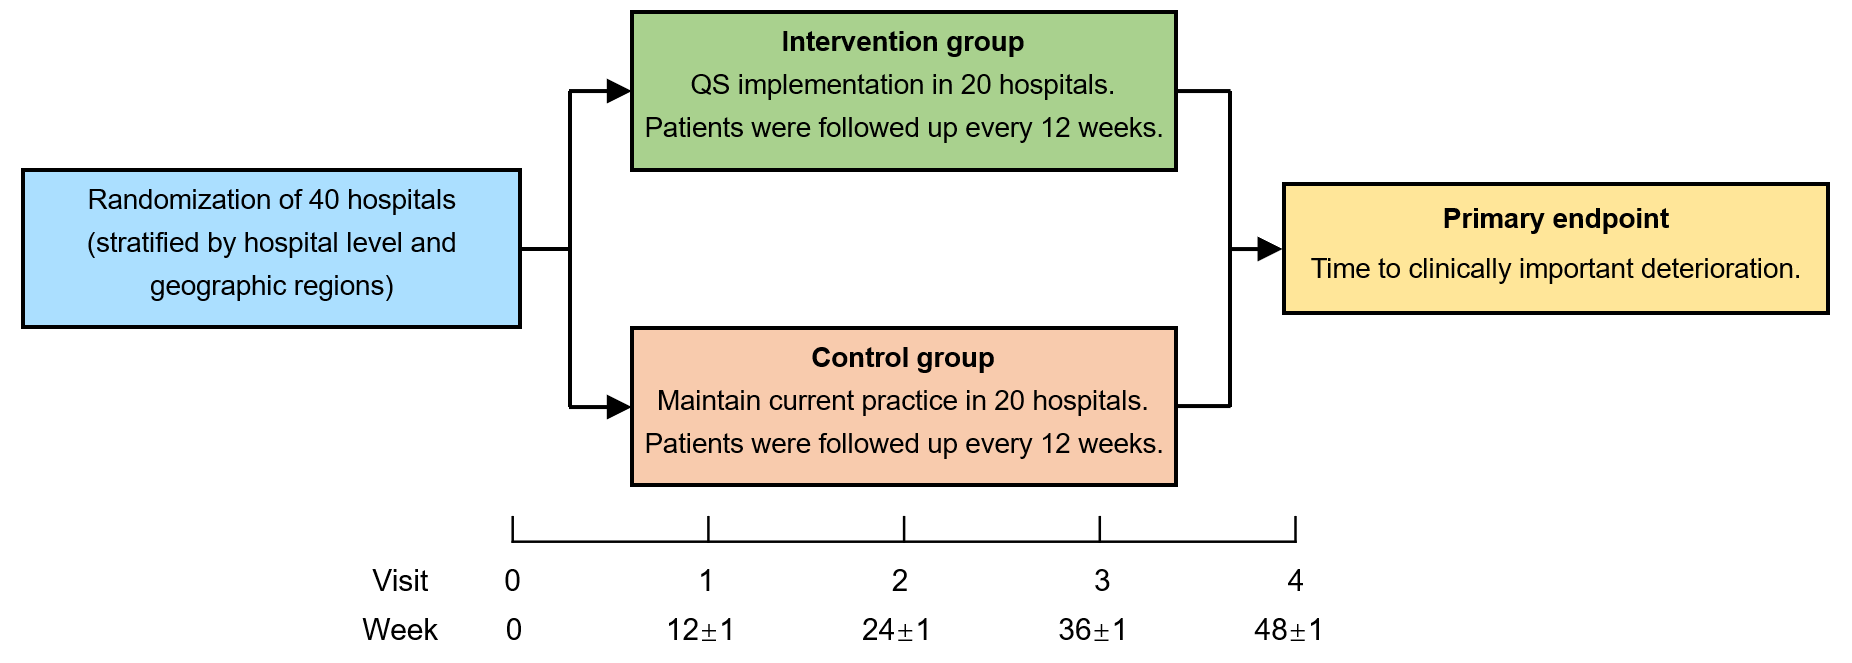


Supplementary Figure 1. Study schematic.


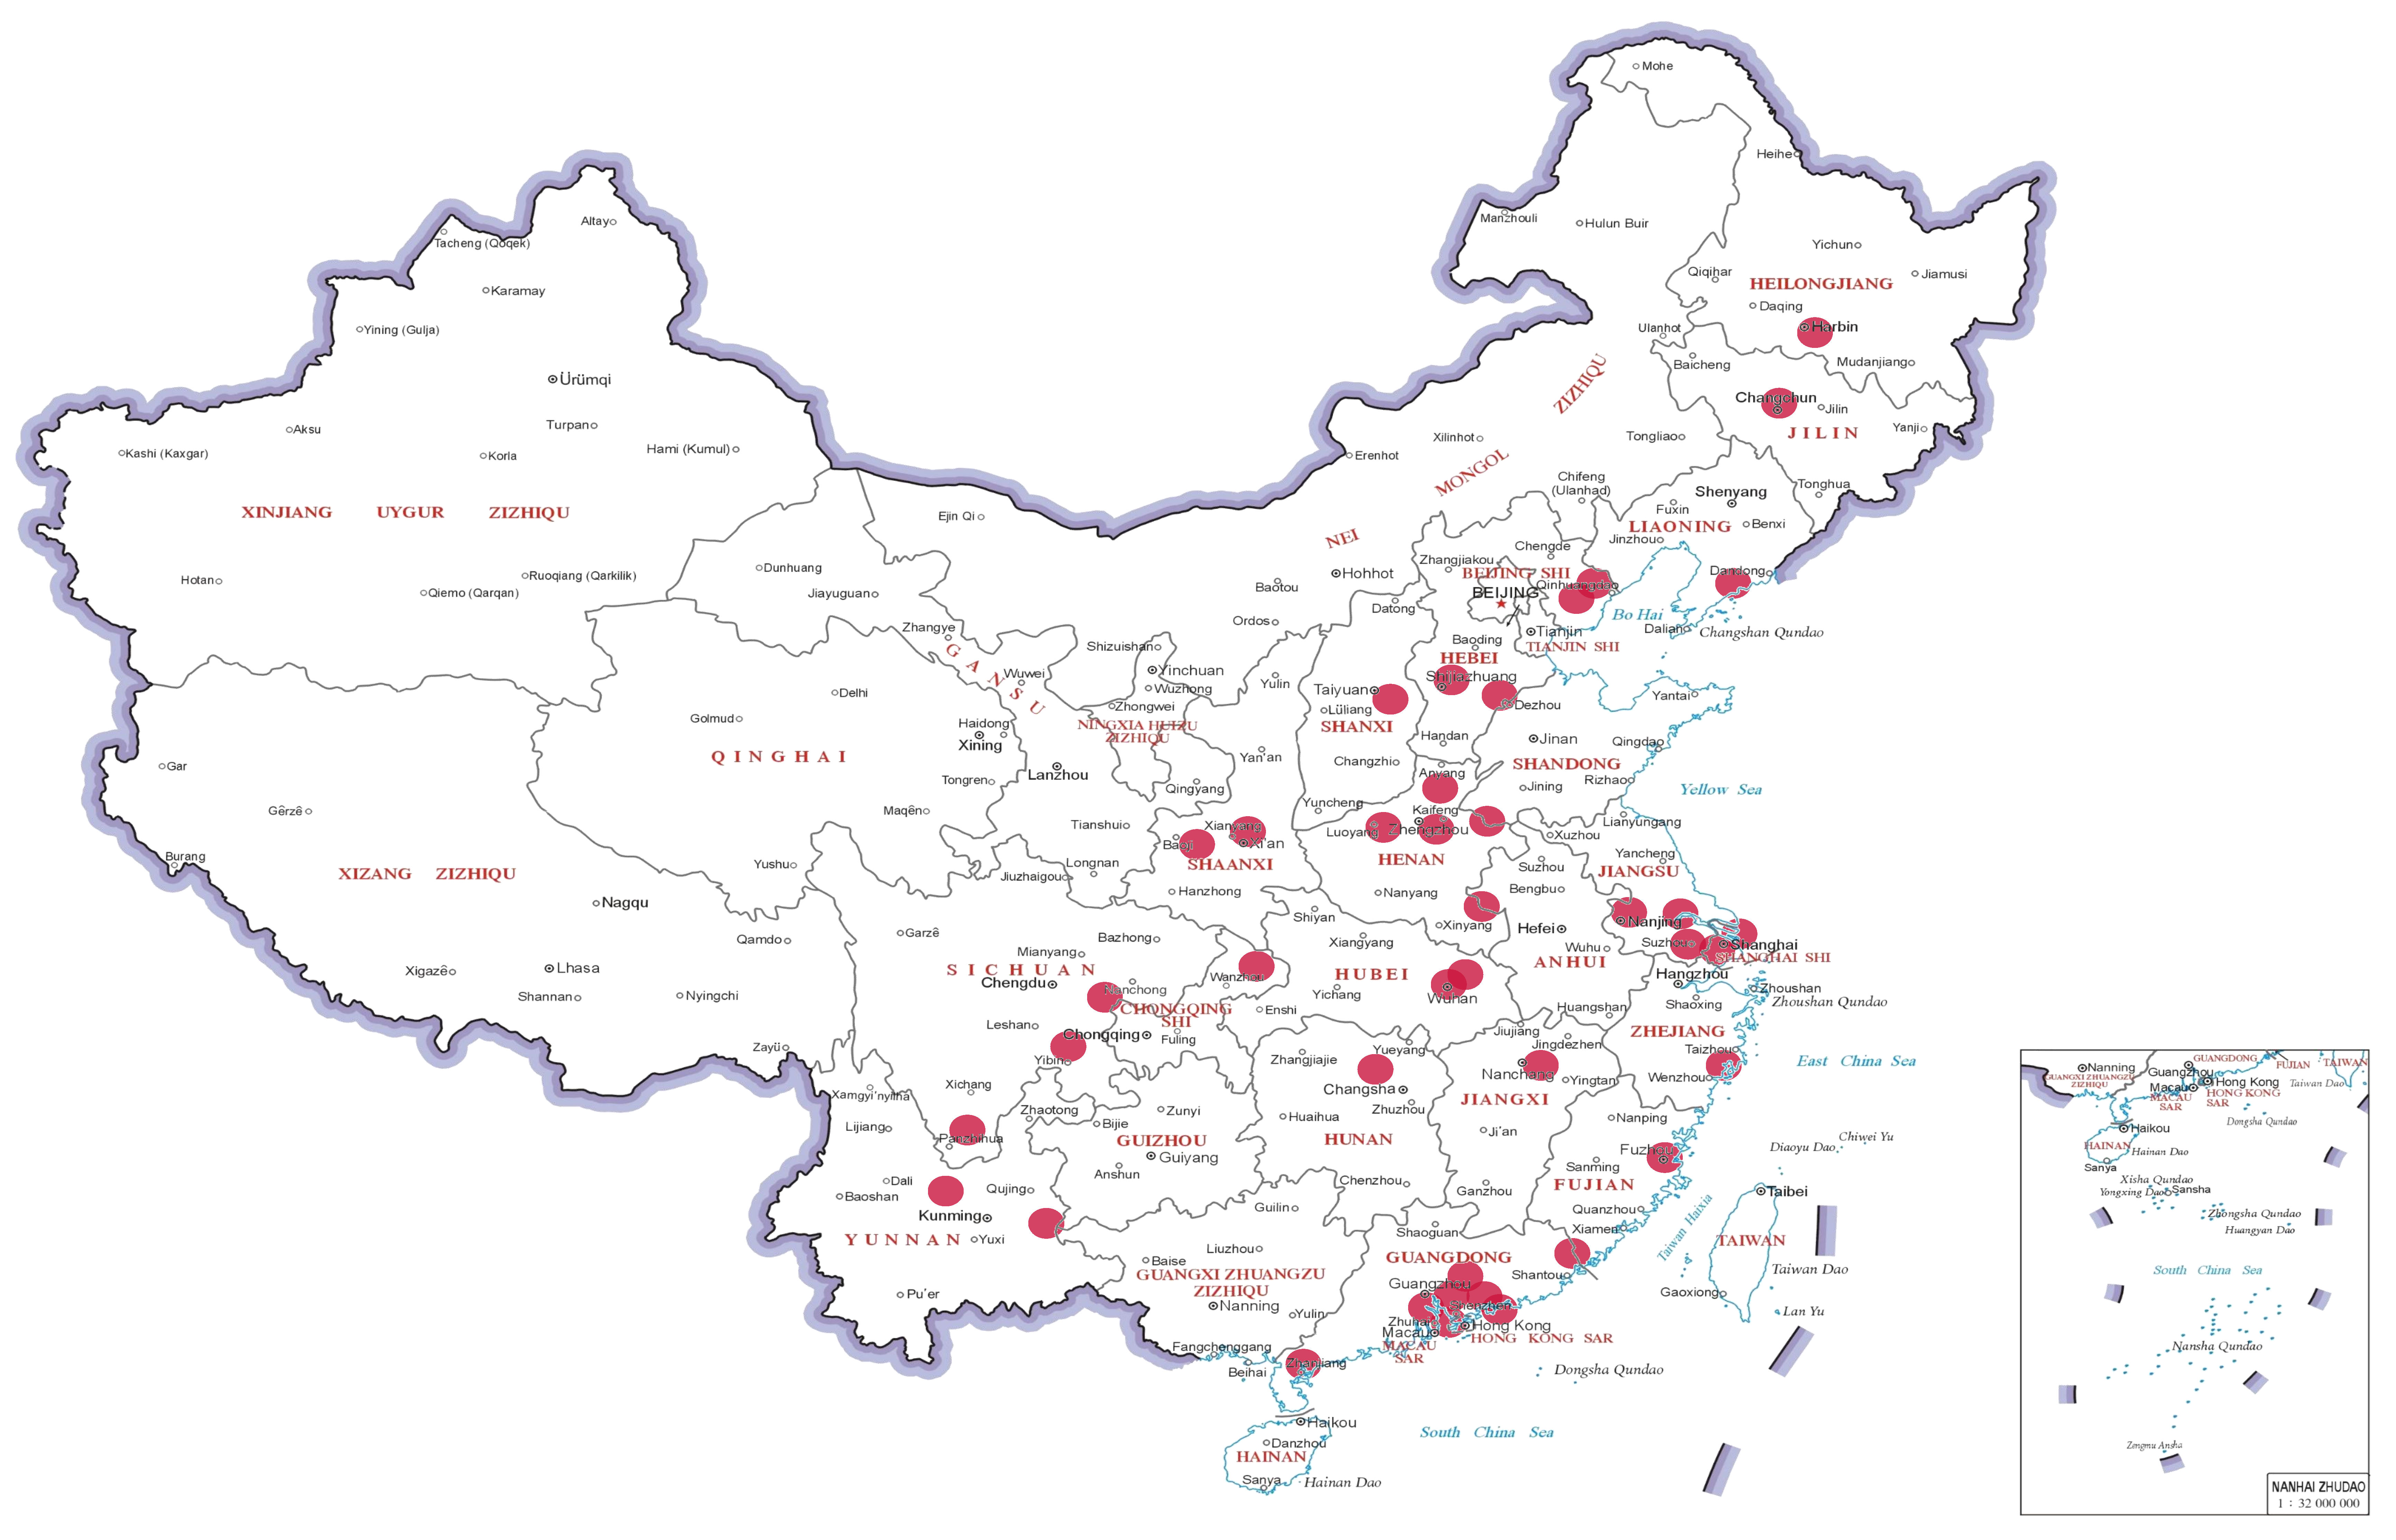


Supplementary Figure 2. The geographical locations of 40 hospitals in China.


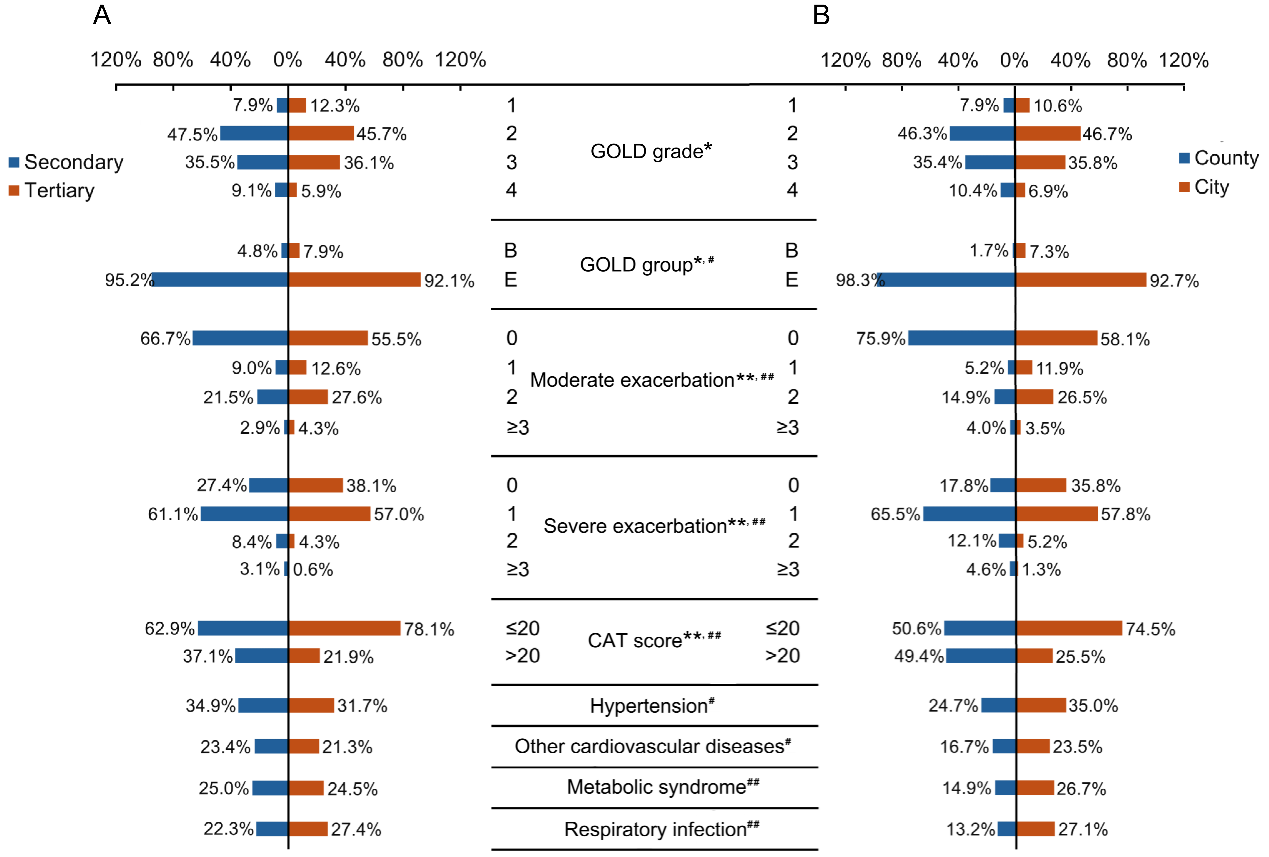


Supplementary Figure 3. Comparison of key disease burden indicators in patients with COPD across different hospital levels (A) and hospital regions (B). *P<0.05 and **P<0.005 for secondary vs. tertiary hospitals; #P<0.05 and ##P<0.005 for county-based vs. city-based hospitals. CAT: COPD assessment test; GOLD: Global Initiative for Chronic Obstructive Lung Disease.

Supplementary Table 1. The number of patients in each hospital.

| **Hospital name** | **Hospital level** | **Geographic region** | **Hospital location** | **Number of patients** |
| --- | --- | --- | --- | --- |
| Luoyang Sixth People's Hospital | Secondary | Central | City | 27 |
| Shangqiu Third People's Hospital | Secondary | Central | City | 27 |
| Wuhan Red Cross Hospital | Secondary | Central | City | 27 |
| XinCai People's Hospital | Secondary | Central | County | 26 |
| Henan Provincial Chest Hospital | Tertiary | Central | City | 27 |
| The Central Hospital of Wuhan | Tertiary | Central | City | 27 |
| The First Affiliated Hospital of Xinxiang Medical University | Tertiary | Central | City | 27 |
| Yiyang Central Hospital | Tertiary | Central | City | 27 |
| Jinxian County People's Hospital | Secondary | East | County | 26 |
| Nanjing Red Cross Hospital | Secondary | East | City | 27 |
| Sanmen People's Hospital | Secondary | East | County | 25 |
| Shanghai Jing'an District Zhabei Central Hospital | Secondary | East | City | 27 |
| Changzhou Second People's Hospital | Tertiary | East | City | 26 |
| Fujian Medical University Union Hospital | Tertiary | East | City | 25 |
| Shanghai Fifth People’s Hospital | Tertiary | East | City | 27 |
| The First People's Hospital Of Kunshan | Tertiary | East | City | 26 |
| Hebei Gucheng County Hospital | Secondary | North | County | 27 |
| Qian'an People's Hospital | Secondary | North | City | 27 |
| Xinle City Hospital | Secondary | North | City | 27 |
| Yuci District People's Hospital | Secondary | North | City | 27 |
| Central Hospital of Zhuanghe City | Tertiary | North | City | 27 |
| Tangshan People’s Hospital | Tertiary | North | City | 26 |
| The 2nd Affiliated Hospital of Harbin Medical University | Tertiary | North | City | 27 |
| Jilin University Second Hospital | Tertiary | North | City | 27 |
| Dongguan Huangjiang Hospital | Secondary | South | City | 27 |
| Shen Zhen Long Gang District Sixth People's Hospital, Longgang Central Hospital of Shenzhen | Secondary | South | City | 27 |
| Nanhai District Seventh People's Hospital of Foshan | Secondary | South | City | 27 |
| Chencun Hospital Affiliated to Shunde Hospital of Southern Medical University | Secondary | South | City | 27 |
| Zhanjiang Central People's Hospital | Tertiary | South | City | 27 |
| The Baiyun Hospital of Guangzhou First People′s Hospital/The Second People's Hospital of Baiyun District, Guangzhou | Tertiary | South | City | 26 |
| Jieyang City People's Hospital | Tertiary | South | City | 27 |
| The Second People's Hospital of Foshan | Tertiary | South | City | 27 |
| People's Hospital of Luxi Yunnan Province | Secondary | West | County | 27 |
| The Jintai Hospital of Baoji City | Secondary | West | City | 27 |
| Wuxi County People's Hospital | Secondary | West | County | 16 |
| Yao An County People's Hospital | Secondary | West | County | 27 |
| Sichun Province Panzhihua Central Hospital | Tertiary | West | City | 25 |
| Suining Central Hospital | Tertiary | West | City | 27 |
| Yibin Second People's Hospital | Tertiary | West | City | 25 |
| Xian Yang Central Hospital | Tertiary | West | City | 27 |

Supplementary Table 2. Inhalation device technique assessment form.

| Inhalation device type | pMDI  DPI  SMI | ____No. _____ | |
| --- | --- | --- | --- |
| Scoring items | Assessment content | 1 point  (Correct) | 0 points  (Wrong) |
| Preparation phase | Check the counter (if any) to confirm there is sufficient dose remaining and when it needs to be replaced, shake the inhaler device (refer to the manufacturer’s instructions if applicable) |  |  |
| Assemble | Assemble inhaler device ready for use, refer to instructions to confirm how to fill and how often to refill, open inhaler device or cap |  |  |
| Exhale | Away from the mouthpiece and exhale as fully as possible |  |  |
| Mouth | Put the mouthpiece into mouth and wrap it tightly with lips |  |  |
| Inhale | DPI: Breathe in quickly and forcefully (in 2~3 seconds)，pMDI/SMI: Breathe in slowly and deeply (exceed 4~5 seconds) |  |  |
| Hold breath | Remove the inhaler device from mouth, hold breath for 5~10 seconds, and then slowly exhale |  |  |
| Close and repeat | Close the inhaler or cap and repeat if necessary |  |  |
| Total score | |  | |
| Does the subject can use the inhaler device correctly? | | Yes  No | |

Supplementary Table 3. Pharmacological treatment for patients in GOLD group E.

|  | **Patients** |
| --- | --- |
| **Mono maintenance therapy** |  |
| LAMA | 107(10.8) |
| SABA or SAMA | 55(5.6) |
| LABA | 22(2.2) |
| ICS | 8(0.8) |
| **Combination maintenance therapy** |  |
| LABA+ICS | 304(30.8) |
| Triple therapy | 194(19.6) |
| LABA+LAMA | 165(16.7) |
| Triple therapy in patients with blood eosinophil count data | 178(27.6) |
| Triple therapy in patients with blood eosinophil counts< 300 | 141(28.1) |
| Triple therapy in patients with blood eosinophil counts ≥ 300 | 37(25.7) |
| Triple therapy in patients without blood eosinophil count data | 16(4.7) |
| **Maintenance therapy containing long-acting bronchodilators** | 745(75.4) |
| **Maintenance therapy containing ICS** | 483(48.9) |
| **Consistency with the GOLD recommendation for initial treatment** | 112(17.4) |
| **Other therapy** |  |
| Antitussive/mucolytics/cough-mucolytics | 261(26.4) |
| Methylxanthines | 143(14.5) |
| Antibiotics | 28(2.8) |
| Traditional Chinese medicine | 27(2.7) |
| Oral systemic corticosteroids | 9(0.9) |

Supplementary Table 4. Patient characteristics and disease burden stratified by hospital level and region.

|  | **County§** | **City** | |
| --- | --- | --- | --- |
| **Secondary (n=174)** | **Secondary (n=351)** | **Tertiary (n=530)** |
| **Age, year, mean (SD)** | 66.4±7.9 | 66.1±7.3 | 66.1±7.6 |
| **Sex** |  |  |  |
| Male | 150(86.2) | 311(88.6) | 442(83.4) # |
| Female | 24(13.8) | 40(11.4) | 88(16.6) |
| **BMI, kg/m2, mean (SD)** | 22.0±3.4 | 23.2±3.4 ** | 23.2±3.7 |
| **Education level** |  |  |  |
| Middle school or lower | 143(82.2) | 212(60.4) ** | 316(59.6) # |
| High school or higher | 5(2.9) | 85(24.2) | 101(19.1) |
| Other | 26(14.9) | 54(15.4) | 113(21.3) |
| **Smoking status** |  |  |  |
| Never | 39(22.4) | 63(18.0) | 106(20.0) |
| Previous | 69(39.7) | 144(41.0) | 245(46.2) |
| Current | 66(37.9) | 144(41.0) | 179(33.8) |
| **Pack-years, median (interquartile range)** | 42(30, 56) | 45(30, 55) | 44(30, 53) |
| **Time since the first diagnosis of spirometry-defined COPD, month** | 16.2(1.9, 54.9) | 9.1(1.8, 49.3) | 10.2(1.2, 43.7) |
| **GOLD grade** |  |  |  |
| 1 | 13(7.9) | 27(7.9) | 65(12.3) |
| 2 | 76(46.3) | 164(48.1) | 241(45.7) |
| 3 | 58(35.4) | 121(35.5) | 190(36.1) |
| 4 | 17(10.4) | 29(8.5) | 31(5.9) |
| **GOLD group** |  |  |  |
| B | 3(1.7) | 22(6.3) * | 42(7.9) |
| E | 171(98.3) | 329(93.7) | 488(92.1) |
| **CAT score** |  |  |  |
| ≤20 | 88(50.6) | 242(69.0) ** | 414(78.1) ## |
| >20 | 86(49.4) | 109(31.1) | 116(21.9) |
| **Annual exacerbations per patient, mean (SD)** | 1.5±0.8 | 1.5±0.7 | 1.5±0.8 |
| **Moderate exacerbation in last 12 month** |  |  |  |
| 0 | 132(75.9) | 218(62.1) ** | 294(55.5) |
| 1 | 9(5.2) | 38(10.8) | 67(12.6) |
| 2 | 26(14.9) | 87(24.8) | 146(27.6) |
| ≥3 | 7(4.0) | 8(2.3) | 23(4.3) |
| **Severe exacerbation in last 12 month** |  |  |  |
| 0 | 31(17.8) | 113(32.2) ** | 202(38.1) # |
| 1 | 114(65.5) | 207(59.0) | 302(57.0) |
| 2 | 21(12.1) | 23(6.6) | 23(4.3) |
| ≥3 | 8(4.6) | 8(2.3) | 3(0.6) |
| **Post-bronchodilator FEV1 % predicted, %, mean (SD)** | 52.3±17.8 | 54.2±18.2 | 56±19.1 |
| **Post-bronchodilator FEV1/FVC, %, mean (SD)** | 52.4±10.3 | 52.8±11.1 | 53.5±10.0 |
| **Comorbidities** |  |  |  |
| Hypertension | 43(24.7) | 140(39.9) ** | 168(31.7) # |
| Other cardiovascular diseases | 29(16.7) | 94(26.8) * | 113(21.3) |
| Metabolic syndrome | 26(14.9) | 105(29.9) ** | 130(24.5) |
| History of respiratory infection | 23(13.2) | 94(26.8) ** | 145(27.4) |

Note: §No tertiary hospitals located in county were included in this study. *P<0.05 and **P<0.005 for county-based vs. city-based secondary hospitals; #P<0.05 and ##P<0.005 for secondary vs. tertiary hospitals in the city.

Supplementary Table 5. The treatment of COPD stratified by hospital level and region.

| **Characteristics** | **County§** | **City** | |
| --- | --- | --- | --- |
| **Secondary (n=174)** | **Secondary (n=351)** | **Tertiary (n=530)** |
| **Mono maintenance therapy** |  |  |  |
| LAMA | 32(18.4) | 26(7.4) ** | 52(9.8) |
| SABA or SAMA | 8(4.6) | 14(4) | 36(6.8) |
| LABA | 9(5.2) | 0(0.0) ** | 13(2.5) ## |
| ICS | 2(1.2) | 1(0.3) | 5(0.9) |
| **Combination maintenance therapy** |  |  |  |
| LABA+ICS | 58(33.3) | 120(34.2) | 144(27.2) # |
| Triple therapy | 16(9.2) | 79(22.5) ** | 113(21.3) |
| LABA+LAMA | 4(2.3) | 54(15.4) ** | 121(22.8) # |
| **Maintenance therapy containing long-acting bronchodilators** | 108(62.1) | 271(77.2) ** | 413(77.9) |
| **Maintenance therapy containing ICS** | 71(40.8) | 192(54.7) ** | 251(47.4) # |
| **Other therapy** |  |  |  |
| Antitussive/mucolytics/cough-mucolytics | 39(22.4) | 91(25.9) | 147(27.7) |
| Methylxanthines | 30(17.2) | 19(5.4) ** | 102(19.3) ## |
| Antibiotics | 10(5.8) | 14(4) | 6(1.1) # |
| Traditional Chinese medicine | 1(0.6) | 8(2.3) | 20(3.8) |
| Oral/systemic corticosteroids | 6(3.5) | 0(0.0) ** | 3(0.6) |
| **Inhaled therapy management** |  |  |  |
| Started maintenance therapy within one month after diagnosis | 125(78.1) | 218(65.3) ** | 365(72.3) # |
| Self-reported good compliance | 61(57.0) | 98(42.6) | 153(47.4) |
| Appropriate use of inhaler device | 62(45.6) | 173(68.7) ** | 255(63.1) |
| Inhaler technique check | 129(74.1) | 282(80.3) | 451(85.1) |
| Inhaler technique education | 73(83.9) | 78(96.3) * | 146(86.9) # |
| **Non-pharmaceutical treatment** | 8(4.6) | 5(1.4) * | 13(2.5) |
| **Smoking cessation education** | 131(97.0) | 267(92.7) | 370(87.3) # |

Note: §No tertiary hospitals located in county were included in this study. *P<0.05 and **P<0.005 for county-based vs. city-based secondary hospitals; #P<0.05 and ##P<0.005 for secondary vs. tertiary hospitals in the city.

Supplementary Table 6. The treatment of COPD stratified by education level.

| **Characteristics** | **Middle school or lower (n=622)** | **High school or higher (n=191)** | **Other (n=242)** | **P** |
| --- | --- | --- | --- | --- |
| **Mono maintenance therapy** |  |  |  |  |
| LAMA | 74(11) | 13(6.8) | 23(11.9) | 0.18 |
| SABA or SAMA | 40(6) | 7(3.7) | 11(5.7) | 0.47 |
| LABA | 11(1.6) | 2(1.1) | 9(4.7) | 0.04 |
| ICS | 5(0.8) | 1(0.5) | 2(1) | 0.88 |
| **Combination maintenance therapy** |  |  |  |  |
| LABA+ICS | 202(30.1) | 59(30.9) | 61(31.6) | 0.92 |
| Triple therapy | 133(19.8) | 47(24.6) | 28(14.5) | 0.05 |
| LABA+LAMA | 106(15.8) | 38(19.9) | 35(18.1) | 0.37 |
| **Maintenance therapy containing long-acting bronchodilators** | 503(75) | 150(78.5) | 139(72) | 0.33 |
| **Maintenance therapy containing ICS** | 325(48.4) | 103(53.9) | 86(44.6) | 0.18 |
| **Other therapy** |  |  |  |  |
| Antitussive/mucolytics/cough-mucolytics | 169(25.2) | 49(25.7) | 59(30.6) | 0.32 |
| Methylxanthines | 113(16.8) | 17(8.9) | 21(10.9) | 0.01 |
| Antibiotics | 13(1.9) | 6(3.1) | 11(5.7) | 0.02 |
| Traditional Chinese medicine | 17(2.5) | 6(3.1) | 6(3.1) | 0.85 |
| Oral/systemic corticosteroids | 4(0.6) | 0(0) | 5(2.6) | 0.02 |
| **Inhaled therapy management** |  |  |  |  |
| Started maintenance therapy within one month after diagnosis | 452(72.1) | 133(69.6) | 123(68) | 0.51 |
| Self-reported good compliance | 180(42.3) | 71(50.4) | 61(65.6) | <0.001 |
| Appropriate use of inhaler device | 326(61.2) | 95(65.1) | 69(61.1) | 0.68 |
| Inhaler technique check | 572(85.3) | 155(81.2) | 135(70) | <0.001 |
| Inhaler technique education | 201(87.4) | 45(90) | 51(91.1) | 0.69 |
| **Non-pharmaceutical treatment** | 12(1.8) | 9(4.7) | 5(2.6) | 0.07 |
| **Smoking cessation education** | 491(92.1) | 134(86.5) | 143(89.9) | 0.10 |

Supplementary Table 7. The treatment of COPD stratified by the frequency of exacerbation.

| **Characteristics** | **>2 moderate exacerbation or >1 severe exacerbation** | | **P** |
| --- | --- | --- | --- |
| **No (n=935)** | **Yes (n=120)** |
| **Mono maintenance therapy** |  |  |  |
| LAMA | 89(9.5) | 21(17.5) | 0.01 |
| SABA or SAMA | 47(5.0) | 11(9.2) | 0.06 |
| LABA | 17(1.8) | 5(4.2) | 0.09 |
| ICS | 7(0.8) | 1(0.8) | 1.00 |
| **Combination maintenance therapy** |  |  |  |
| LABA+ICS | 288(30.8) | 34(28.3) | 0.58 |
| Triple therapy | 182(19.5) | 26(21.7) | 0.57 |
| LABA+LAMA | 152(16.3) | 27(22.5) | 0.09 |
| **Maintenance therapy containing long-acting bronchodilators** | 696(74.5) | 96(80.0) | 0.18 |
| **Maintenance therapy containing ICS** | 461(49.3) | 53(44.2) | 0.29 |
| **Other therapy** |  |  |  |
| Antitussive/mucolytics/cough-mucolytics | 227(24.3) | 50(41.7) | <0.001 |
| Methylxanthines | 126(13.5) | 25(20.8) | 0.03 |
| Antibiotics | 26(2.8) | 4(3.3) | 0.77 |
| Traditional Chinese medicine | 25(2.7) | 4(3.3) | 0.56 |
| Oral/systemic corticosteroids | 6(0.6) | 3(2.5) | 0.07 |
| **Inhaled therapy management** |  |  |  |
| Started maintenance therapy within one month after diagnosis | 635(71.8) | 73(63.5) | 0.06 |
| Self-reported good compliance | 278(47.6) | 34(44.7) | 0.64 |
| Appropriate use of inhaler device | 447(63.9) | 43(46.7) | 0.002 |
| Inhaler technique check | 766(81.9) | 96(80.0) | 0.61 |
| Inhaler technique education | 271(89.2) | 26(81.3) | 0.30 |
| **Non-pharmaceutical treatment** | 23(2.5) | 3(2.5) | 1.00 |
| **Smoking cessation education** | 673(90.1) | 95(95.0) | 0.11 |

Supplementary Table 8. The treatment of COPD stratified by GOLD grade.

| **Characteristics** | **GOLD 1 (n=105)** | **GOLD 2 (n=481)** | **GOLD 3 (n=369)** | **GOLD 4 (n=77)** | **P** |
| --- | --- | --- | --- | --- | --- |
| **Mono maintenance therapy** |  |  |  |  |  |
| LAMA | 11(10.5) | 49(10.2) | 37(10.0) | 10(13.0) | 0.89 |
| SABA or SAMA | 1(1.0) | 18(3.7) | 34(9.2) | 5(6.5) | <0.001 |
| LABA | 0(0.0) | 13(2.7) | 8(2.2) | 1(1.3) | 0.38 |
| ICS | 1(1.0) | 4(0.8) | 2(0.5) | 0(0.0) | 0.86 |
| **Combination maintenance therapy** |  |  |  |  |  |
| LABA+ICS | 42(40.0) | 135(28.1) | 108(29.3) | 28(36.4) | 0.06 |
| Triple therapy | 8(7.6) | 87(18.1) | 95(25.8) | 11(14.3) | <0.001 |
| LABA+LAMA | 16(15.2) | 85(17.7) | 64(17.3) | 13(16.9) | 0.95 |
| **Maintenance therapy containing long-acting bronchodilators** | 79(75.2) | 350(72.8) | 286(77.5) | 59(76.6) | 0.45 |
| **Maintenance therapy containing ICS** | 51(48.6) | 217(45.1) | 192(52.0) | 39(50.7) | 0.24 |
| **Other therapy** |  |  |  |  |  |
| Antitussive/mucolytics/cough-mucolytics | 18(17.1) | 130(27.0) | 108(29.3) | 18(23.4) | 0.09 |
| Methylxanthines | 7(6.7) | 66(13.7) | 68(18.4) | 10(13.0) | 0.02 |
| Antibiotics | 3(2.9) | 9(1.9) | 12(3.3) | 0(0.0) | 0.29 |
| Traditional Chinese medicine | 0(0.0) | 15(3.1) | 10(2.7) | 3(3.9) | 0.22 |
| Oral/systemic corticosteroids | 0(0.0) | 2(0.4) | 3(0.8) | 0(0.0) | 0.87 |
| **Inhaled therapy management** |  |  |  |  |  |
| Started maintenance therapy within one month after diagnosis | 72(76.6) | 322(71.1) | 242(68.0) | 54(74.0) | 0.35 |
| Self-reported good compliance | 27(42.2) | 140(46.7) | 117(49.4) | 19(47.5) | 0.77 |
| Appropriate use of inhaler device | 53(66.3) | 219(60.8) | 175(62.3) | 37(72.6) | 0.38 |
| Inhaler technique check | 87(82.9) | 383(79.6) | 309(83.7) | 62(80.5) | 0.47 |
| Inhaler technique education | 26(89.7) | 134(88.7) | 108(89.3) | 21(84.0) | 0.86 |
| **Non-pharmaceutical treatment** | 3(2.9) | 9(1.9) | 10(2.7) | 10(3.9) | 0.53 |
| **Smoking cessation education** | 74(90.2) | 355(92.0) | 270(89.7) | 54(85.7) | 0.41 |

Supplementary Table 9. The treatment of COPD stratified by CAT score.

| **Characteristics** | **CAT ≤20 (n=744)** | **CAT >20 (n=311)** | **P** |
| --- | --- | --- | --- |
| **Mono maintenance therapy** |  |  |  |
| LAMA | 68(9.1) | 42(13.5) | 0.03 |
| SABA or SAMA | 38(5.1) | 20(6.4) | 0.39 |
| LABA | 15(2.0) | 7(2.3) | 0.81 |
| ICS | 6(0.8) | 2(0.6) | 1.00 |
| **Combination maintenance therapy** |  |  |  |
| LABA+ICS | 224(30.1) | 98(31.5) | 0.65 |
| Triple therapy | 157(21.1) | 51(16.4) | 0.08 |
| LABA+LAMA | 134(18.0) | 45(14.5) | 0.16 |
| **Maintenance therapy containing long-acting bronchodilators** | 567(76.2) | 225(72.4) | 0.19 |
| **Maintenance therapy containing ICS** | 374(50.3) | 140(45.0) | 0.12 |
| **Other therapy** |  |  |  |
| Antitussive/mucolytics/cough-mucolytics | 193(25.9) | 84(27.0) | 0.72 |
| Methylxanthines | 105(14.1) | 46(14.8) | 0.77 |
| Antibiotics | 21(2.8) | 9(2.9) | 0.95 |
| Traditional Chinese medicine | 24(3.2) | 5(1.6) | 0.14 |
| Oral/systemic corticosteroids | 4(0.5) | 5(1.6) | 0.13 |
| **Inhaled therapy management** |  |  |  |
| Started maintenance therapy within one month after diagnosis | 519(73.7) | 189(64.1) | 0.002 |
| Self-reported good compliance | 220(46.1) | 92(50.3) | 0.34 |
| Appropriate use of inhaler device | 358(62.5) | 132(60.3) | 0.57 |
| Inhaler technique check | 607(81.6) | 255(82.0) | 0.88 |
| Inhaler technique education | 191(86.8) | 106(91.4) | 0.21 |
| **Non-pharmaceutical treatment** | 17(2.3) | 9(2.9) | 0.56 |
| **Smoking cessation education** | 542(89.0) | 226(95.0) | 0.007 |
